# Supplementary material for: Retracted article: Selective scission of pyridine–boronium complexes: mechanical generation of Brønsted bases and polymerizationcatalysts
Source: Royal Society of Chemistry journal article supplement (doi:10.1039/c0jm03619f), 2011-01-01
Supplement: c0jm03619f2-eoc.pdf [file c0jm03619f2-eoc.pdf]

## Expression of Concern

Fiona McKenzie

---

### **Selective scission of pyridine–boronium complexes: mechanical generation of Brønsted bases and polymerization catalysts**

Kelly M. Wiggins, Todd W. Hudnall, Andrew G. Tennyson and Christopher W. Bielawski

*J. Mater. Chem.*, 2011, **21**, 8355-8359 (DOI: 10.1039/C0JM03619F). Statement published 8<sup>th</sup> December 2014.

---

Expression of concern for ‘Selective scission of pyridine–boronium complexes: mechanical generation of Brønsted bases and polymerization catalysts’ by Kelly M. Wiggins *et al.*, *J. Mater. Chem.*, 2011, **21**, 8355-8359.

The Royal Society of Chemistry has been contacted by the corresponding author of this article and the Research Integrity Officer at The University of Texas at Austin regarding concerns of scientific misconduct affecting this article. The Research Integrity Officer has informed us that an investigation to ascertain the validity of the work reported has found that scientific misconduct has taken place.

*Journal of Materials Chemistry* is publishing this expression of concern in order to alert our readers that we are presently unsure of the reliability of the data reported in the article. We have contacted the Research Integrity Officer to request more details regarding the scientific misconduct determined in their investigation, in order to determine the appropriate course of action.

An expression of concern will continue to be associated with the article until we receive further information from the Research Integrity Officer on this matter.

Fiona McKenzie  
8<sup>th</sup> December 2014  
Executive Editor, *Journal of Materials Chemistry*
